# Supplementary material for: The burden of liver cirrhosis and underlying etiologies: results from the global burden of disease study 2017
Source: publisher site journal article supplement (doi:10.18632/aging.104127), 2021-01-12
Supplement: Supplementary file [file aging-v13i1-104127-supplementary-material-SD1.pdf]

SUPPLEMENTARY FIGURES

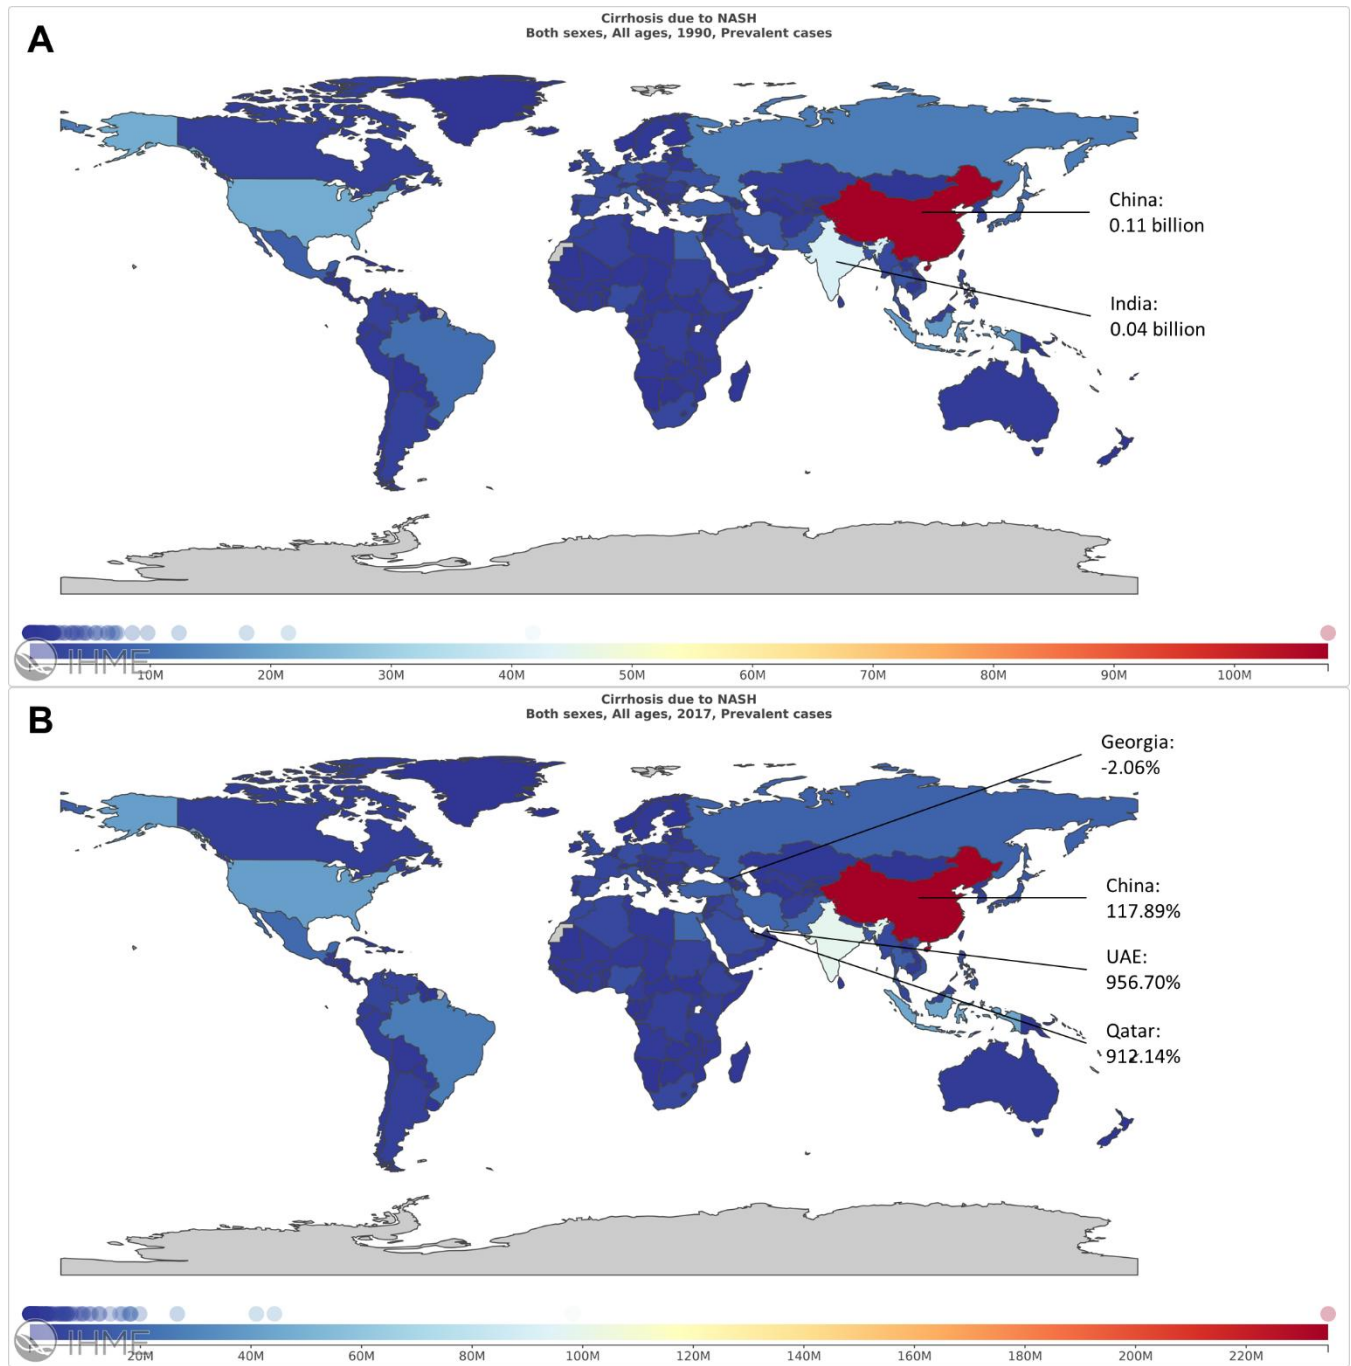

**Supplementary Figure 1. The worldwide prevalence cases of liver cirrhosis caused by HBV in countries. (A)** The worldwide prevalence cases of liver cirrhosis caused by HBV in 1990. **(B)** The worldwide prevalence cases of liver cirrhosis caused by HBV in 2017.

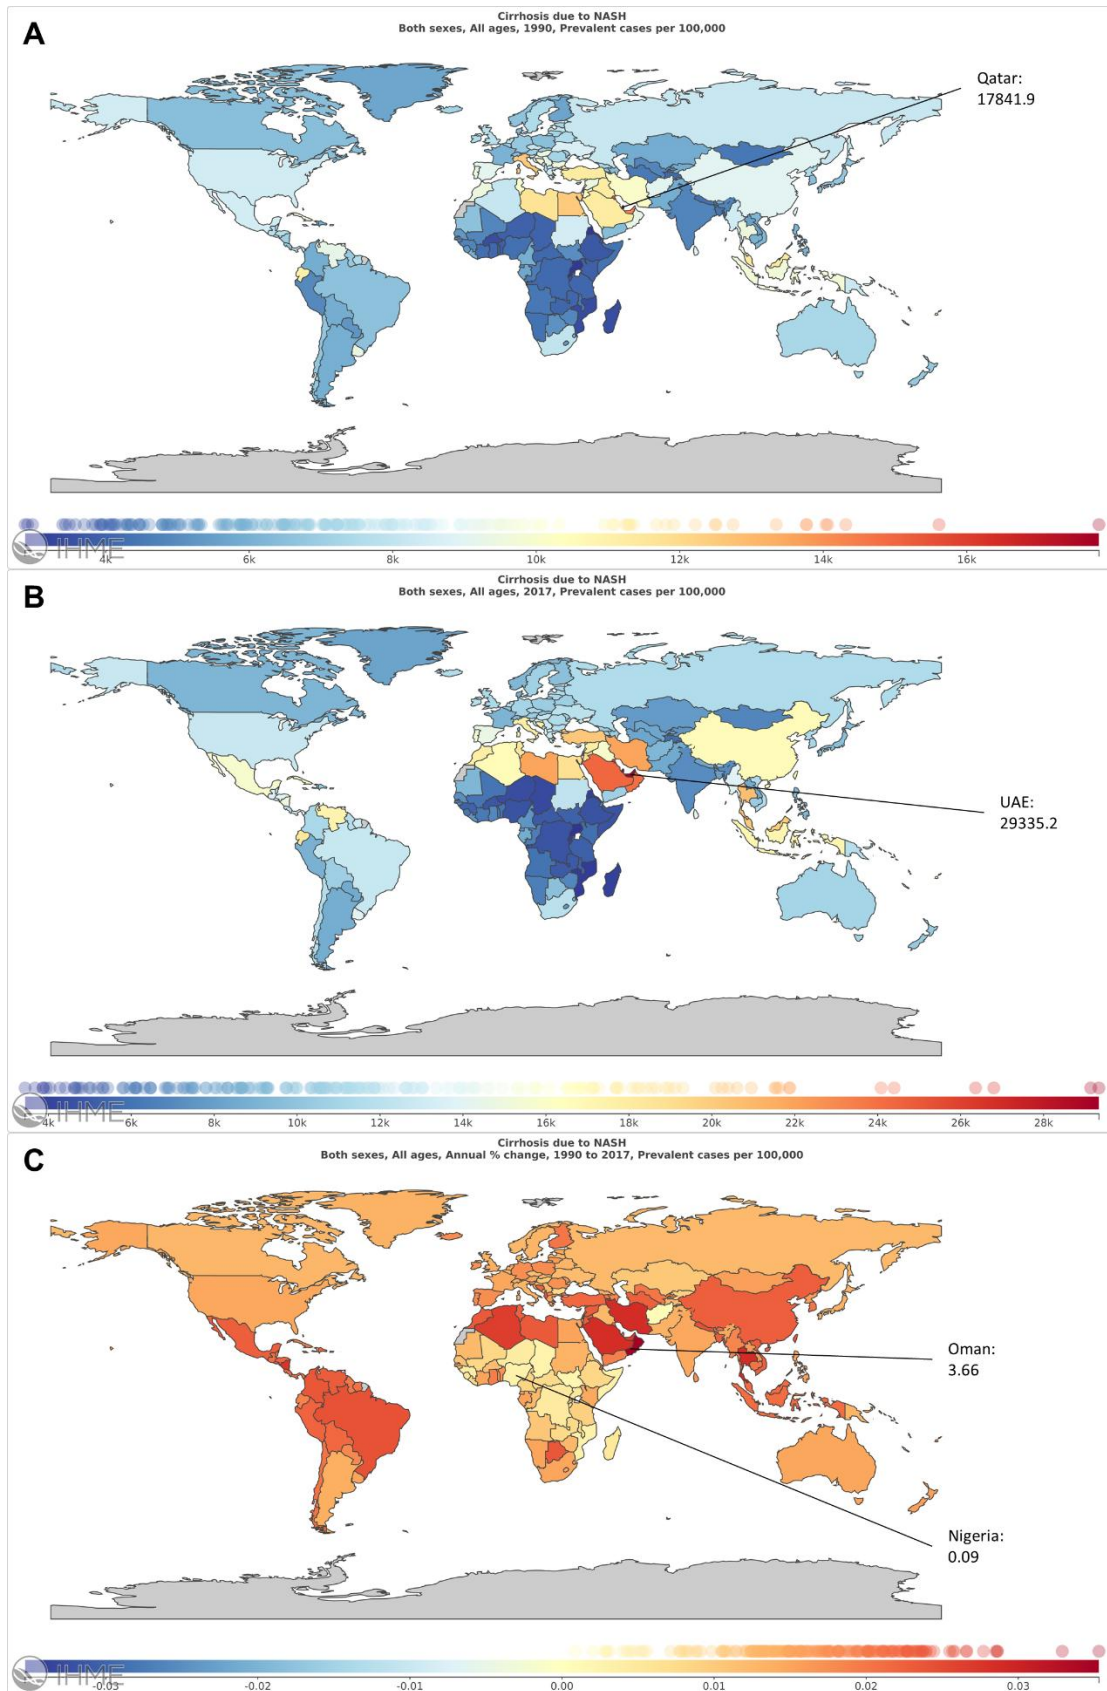

**Supplementary Figure 2. The global burden of liver cirrhosis caused by HBV in countries. (A)** The ASR of liver cirrhosis caused by HBV in 1990. **(B)** The ASR of liver cirrhosis caused by HBV in 2017. **(C)** The EAPC of liver cirrhosis caused by HBV from 1990 to 2017.

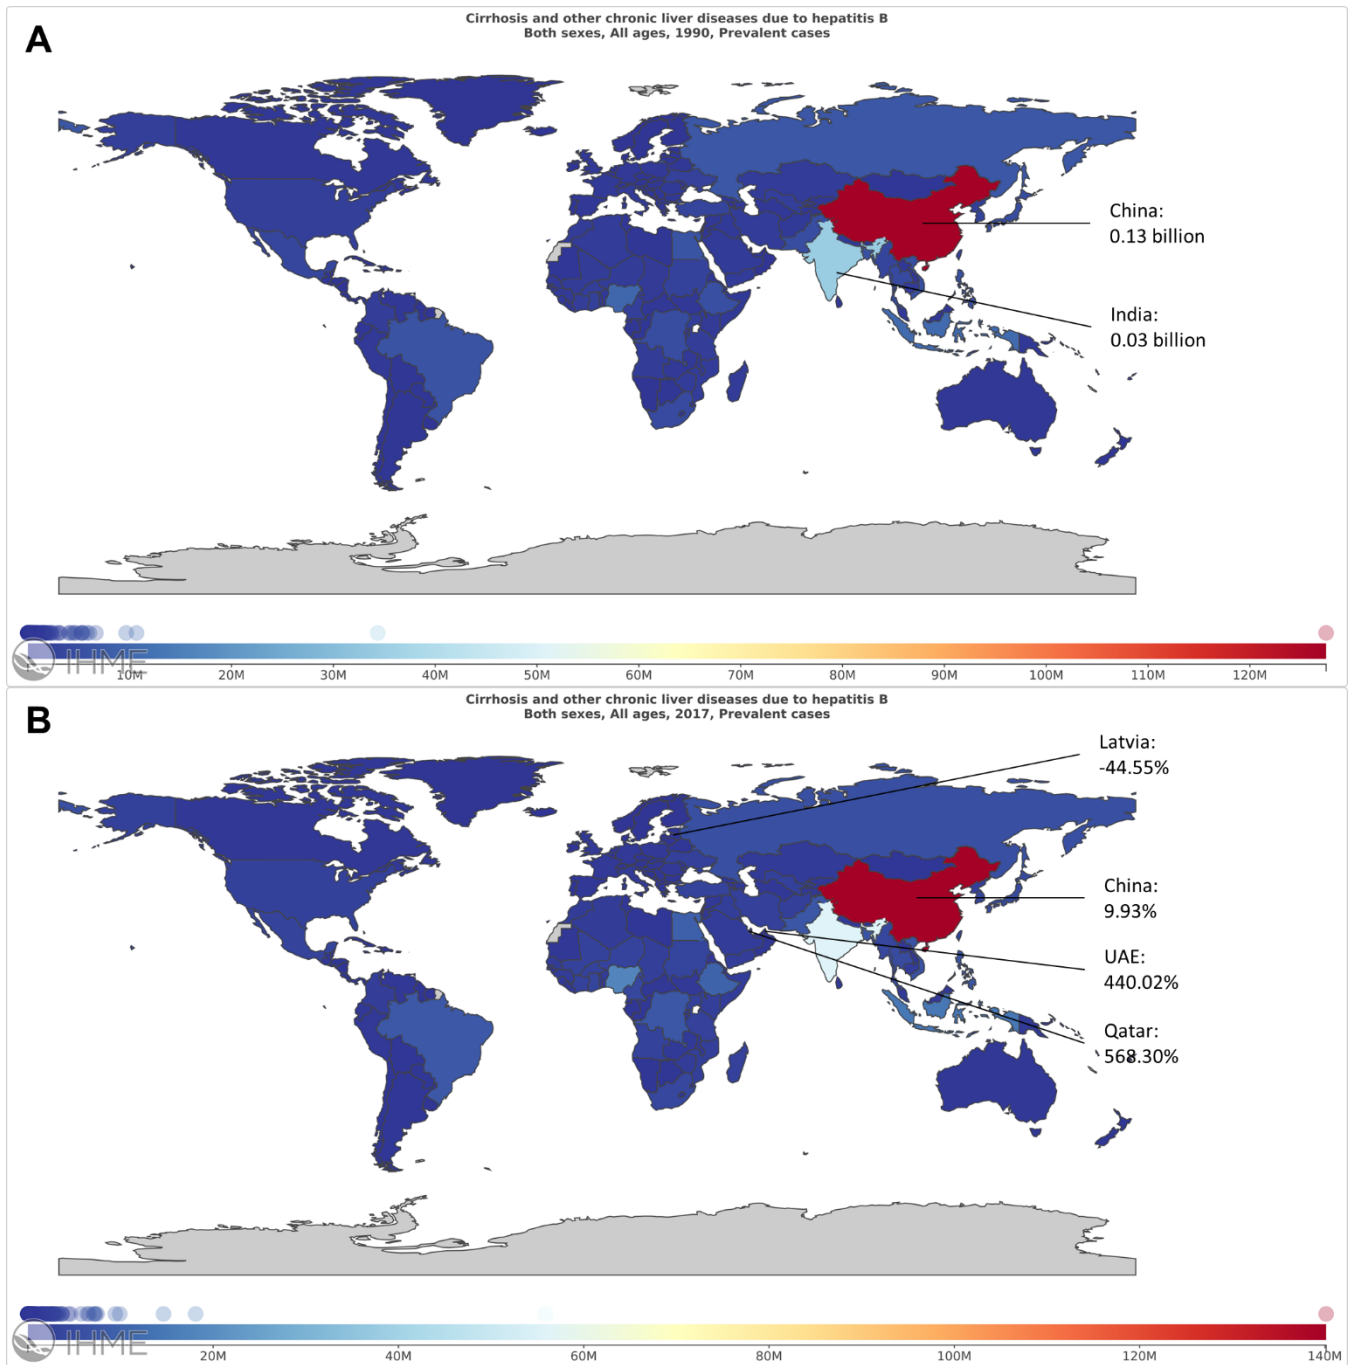

**Supplementary Figure 3. The worldwide prevalence cases of liver cirrhosis caused by HCV in countries. (A)** The worldwide prevalence cases of liver cirrhosis caused by HCV in 1990. **(B)** The worldwide prevalence cases of liver cirrhosis caused by HCV in 2017.

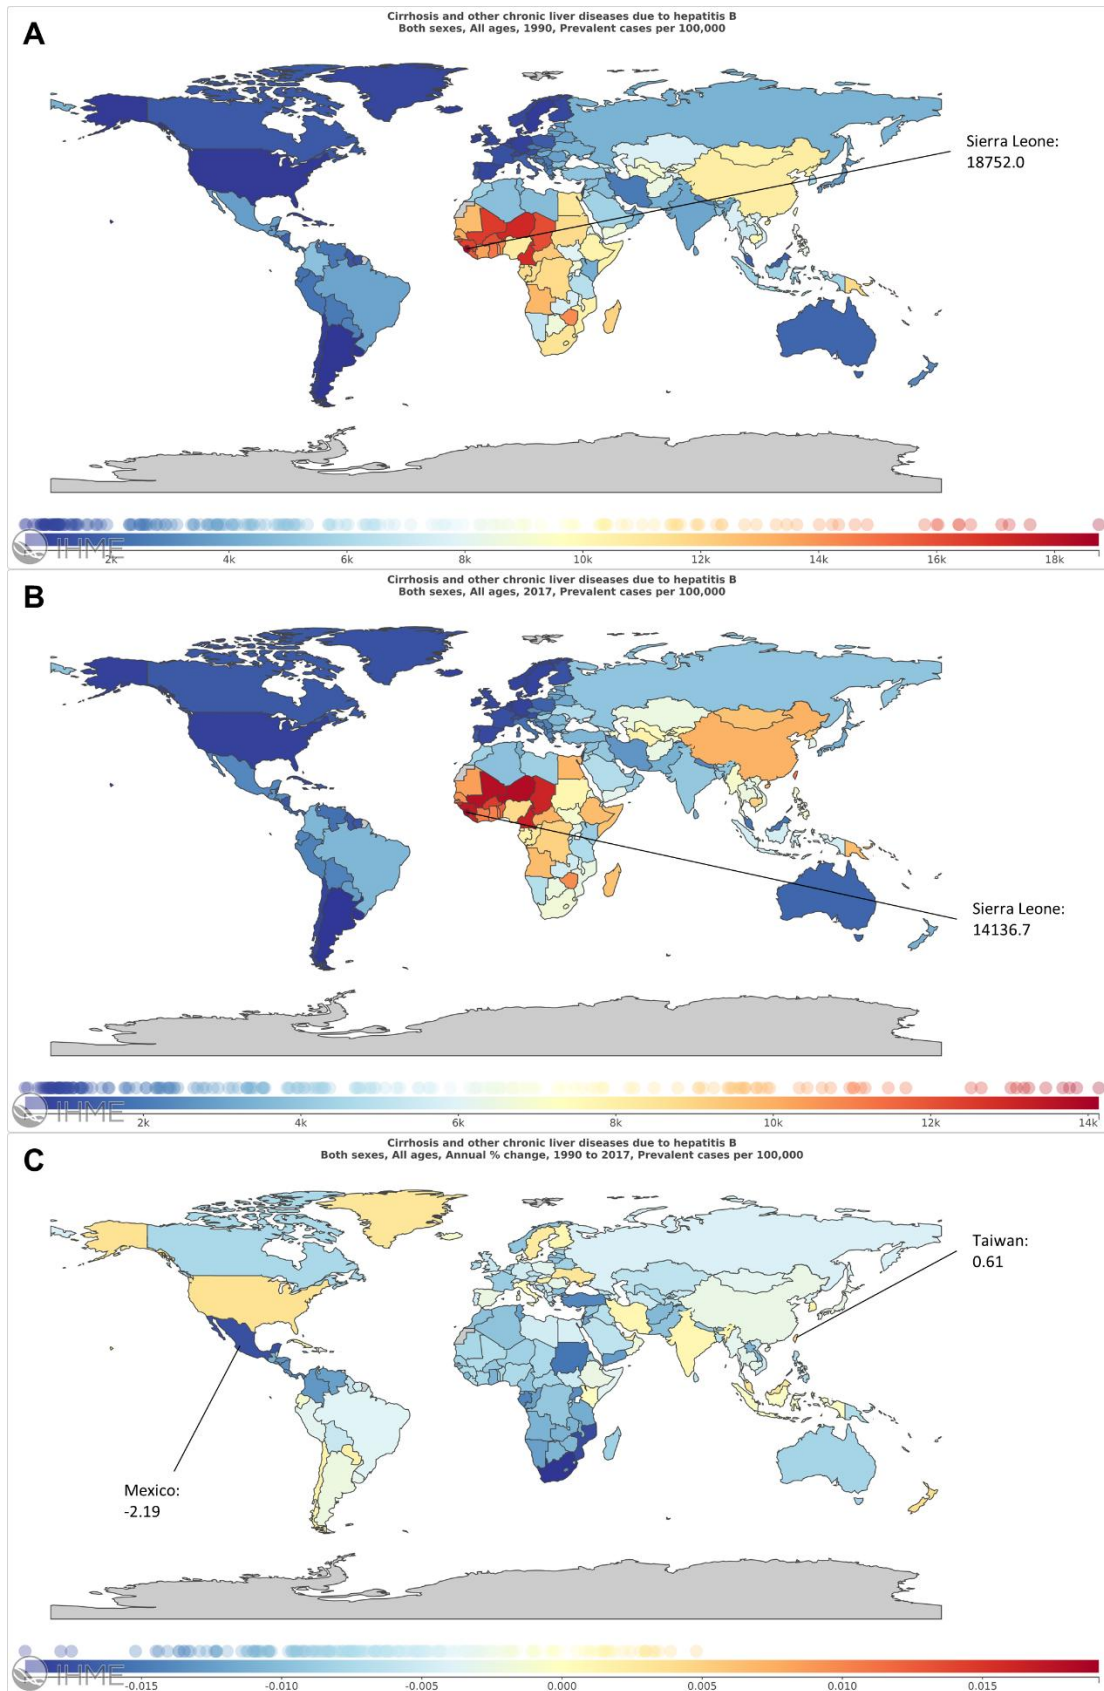

**Supplementary Figure 4. The global burden of liver cirrhosis caused by HCV in countries. (A)** The ASR of liver cirrhosis caused by HCV in 1990. **(B)** The ASR of liver cirrhosis caused by HCV in 2017. **(C)** The EAPC of liver cirrhosis caused by HCV from 1990 to 2017.



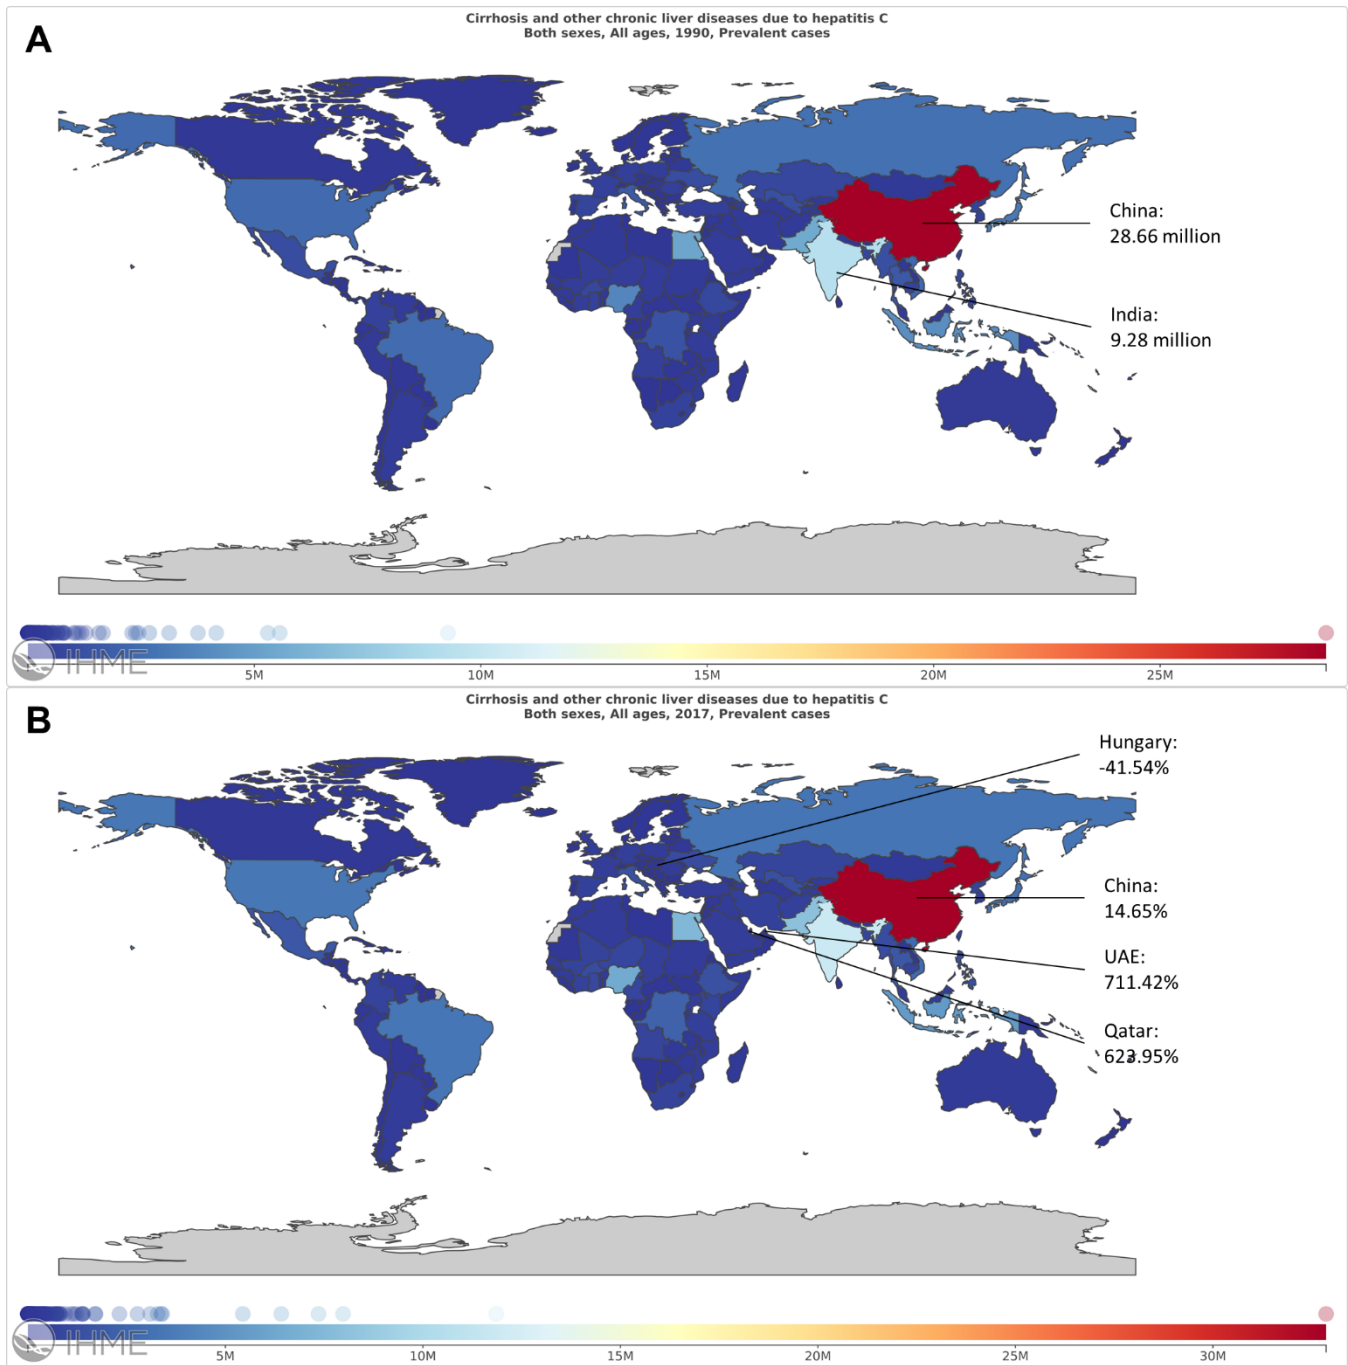

**Supplementary Figure 5. The worldwide prevalence cases of liver cirrhosis caused by alcohol use in countries. (A)** The worldwide prevalence cases of liver cirrhosis caused by alcohol use in 1990. **(B)** The worldwide prevalence cases of liver cirrhosis caused by alcohol use in 2017.

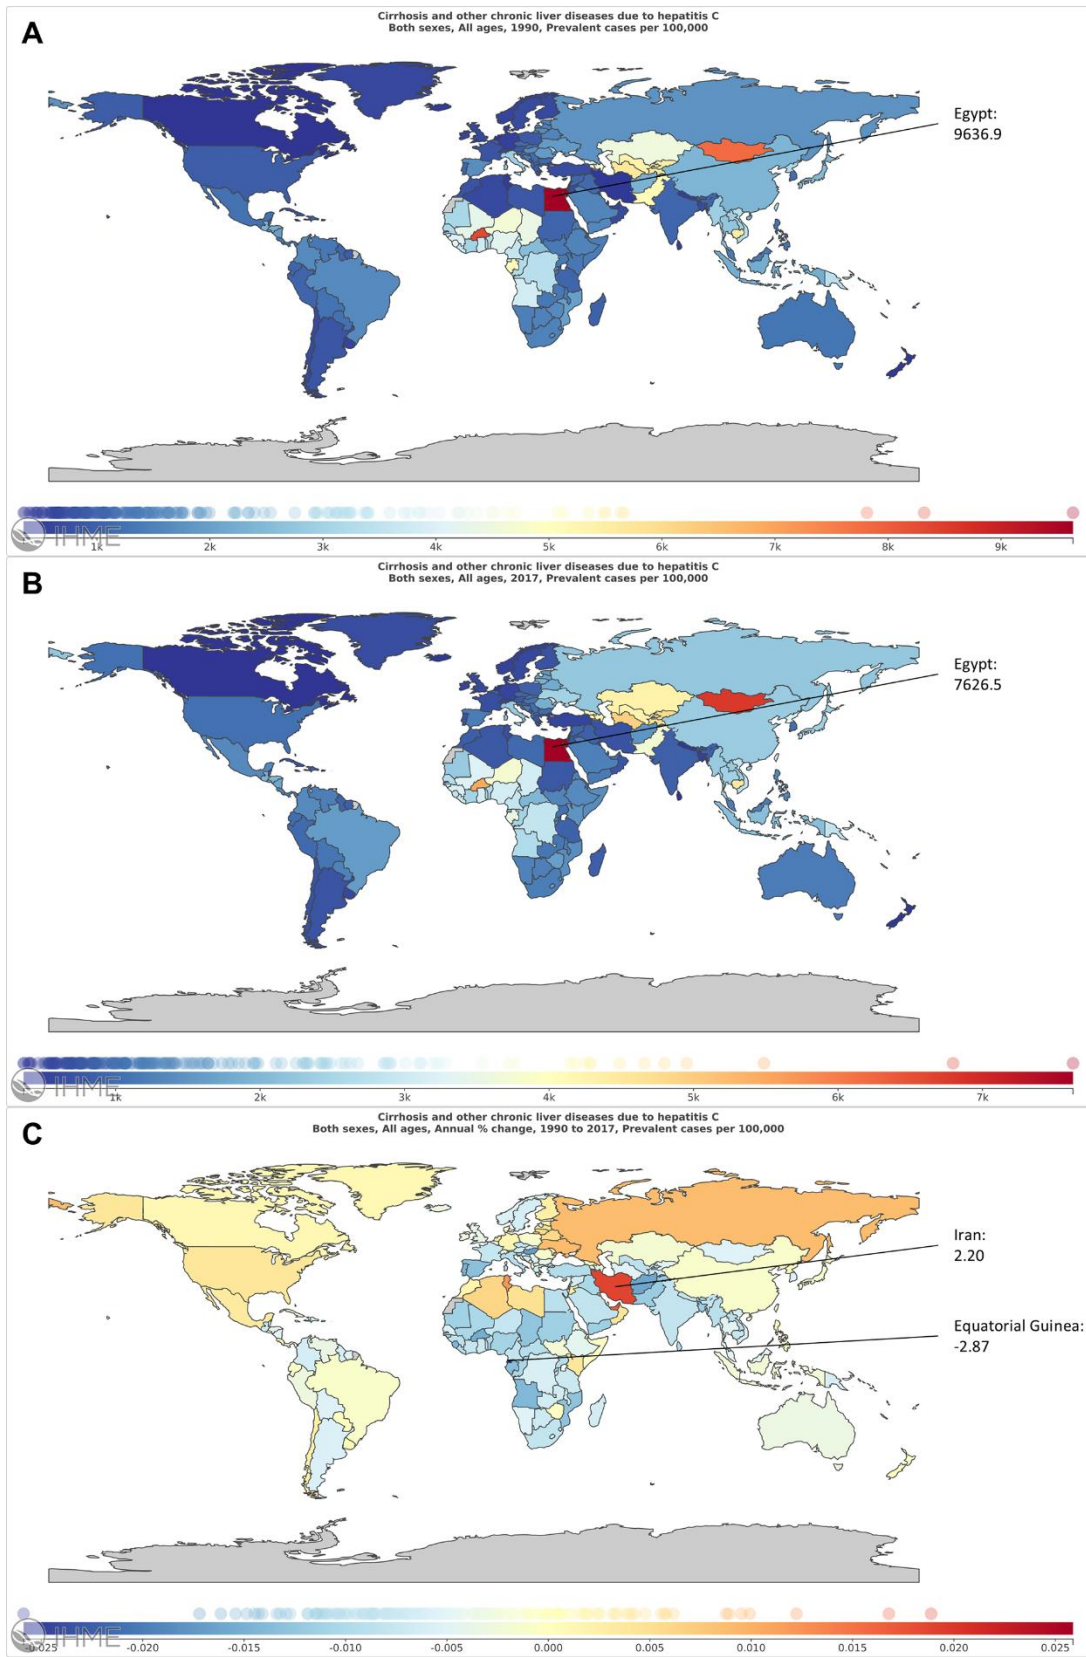

**Supplementary Figure 6. The global burden of liver cirrhosis caused by alcohol use in countries. (A)** The ASR of liver cirrhosis caused by alcohol use in 1990. **(B)** The ASR of liver cirrhosis caused by alcohol use in 2017. **(C)** The EAPC of liver cirrhosis caused by alcohol use from 1990 to 2017.

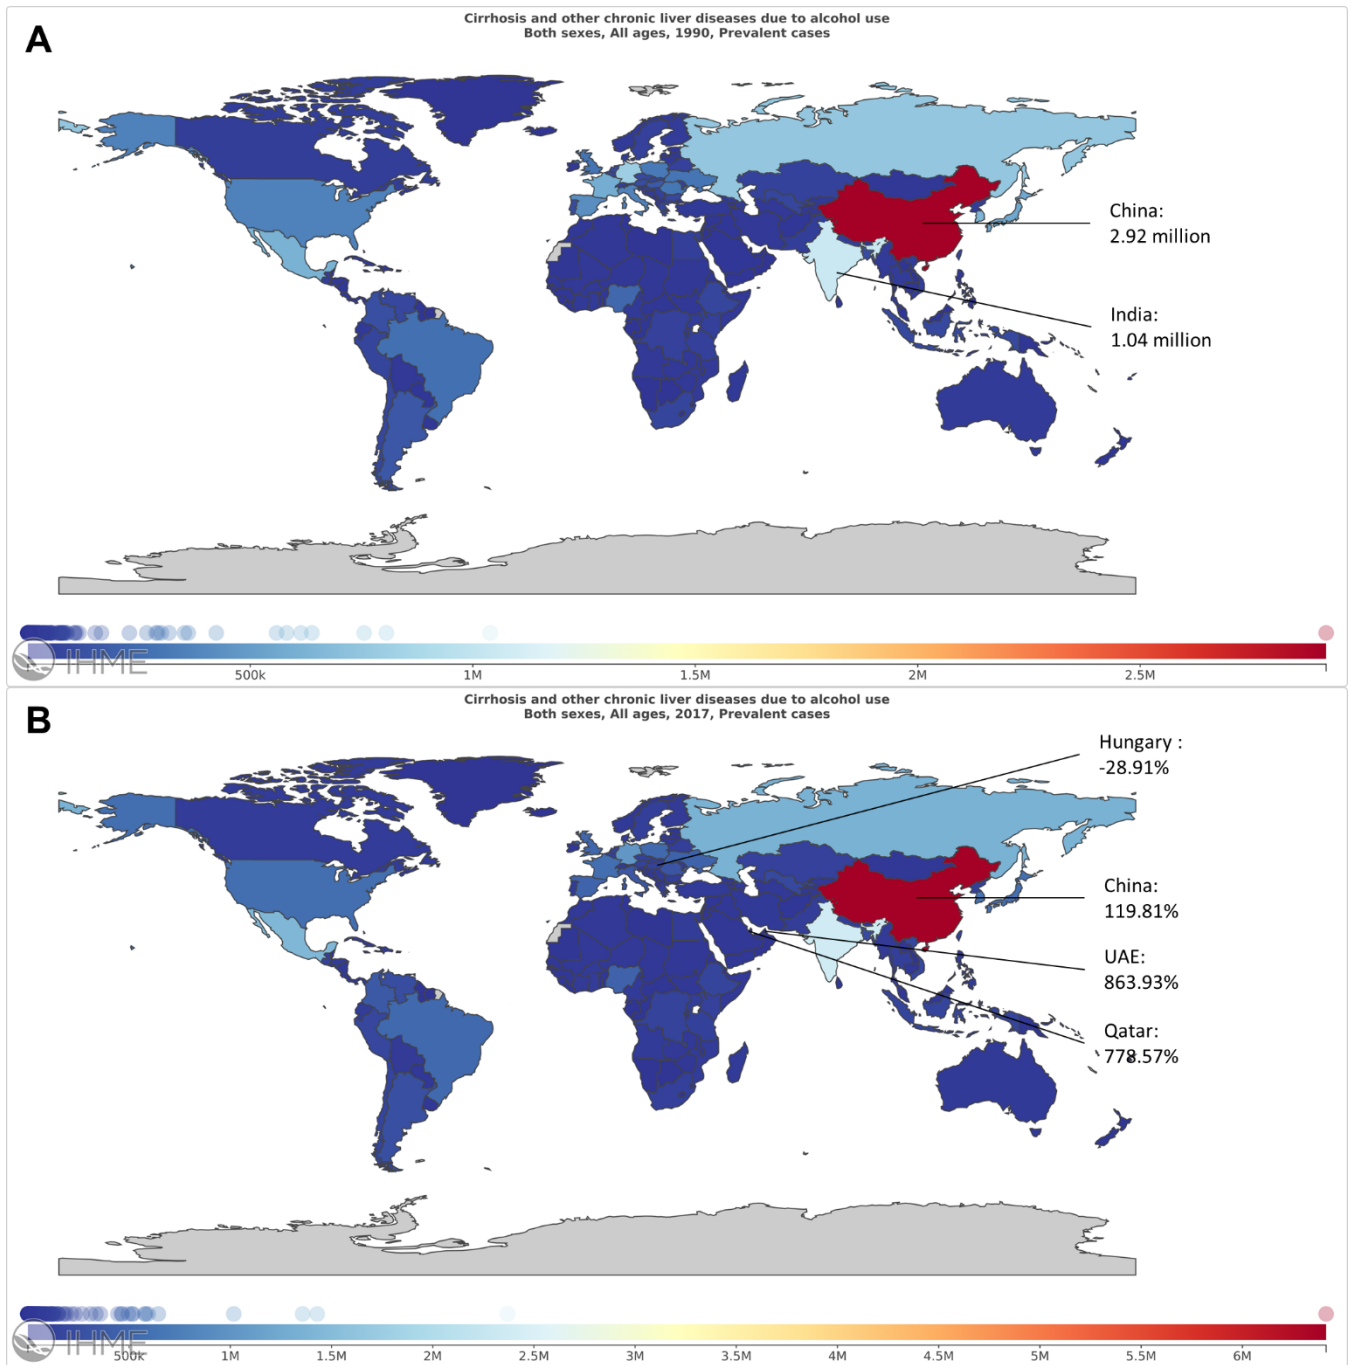

**Supplementary Figure 7. The worldwide prevalence cases of liver cirrhosis caused by NASH in countries. (A)** The worldwide prevalence cases of liver cirrhosis caused by NASH in 1990. **(B)** The worldwide prevalence cases of liver cirrhosis caused by NASH in 2017.

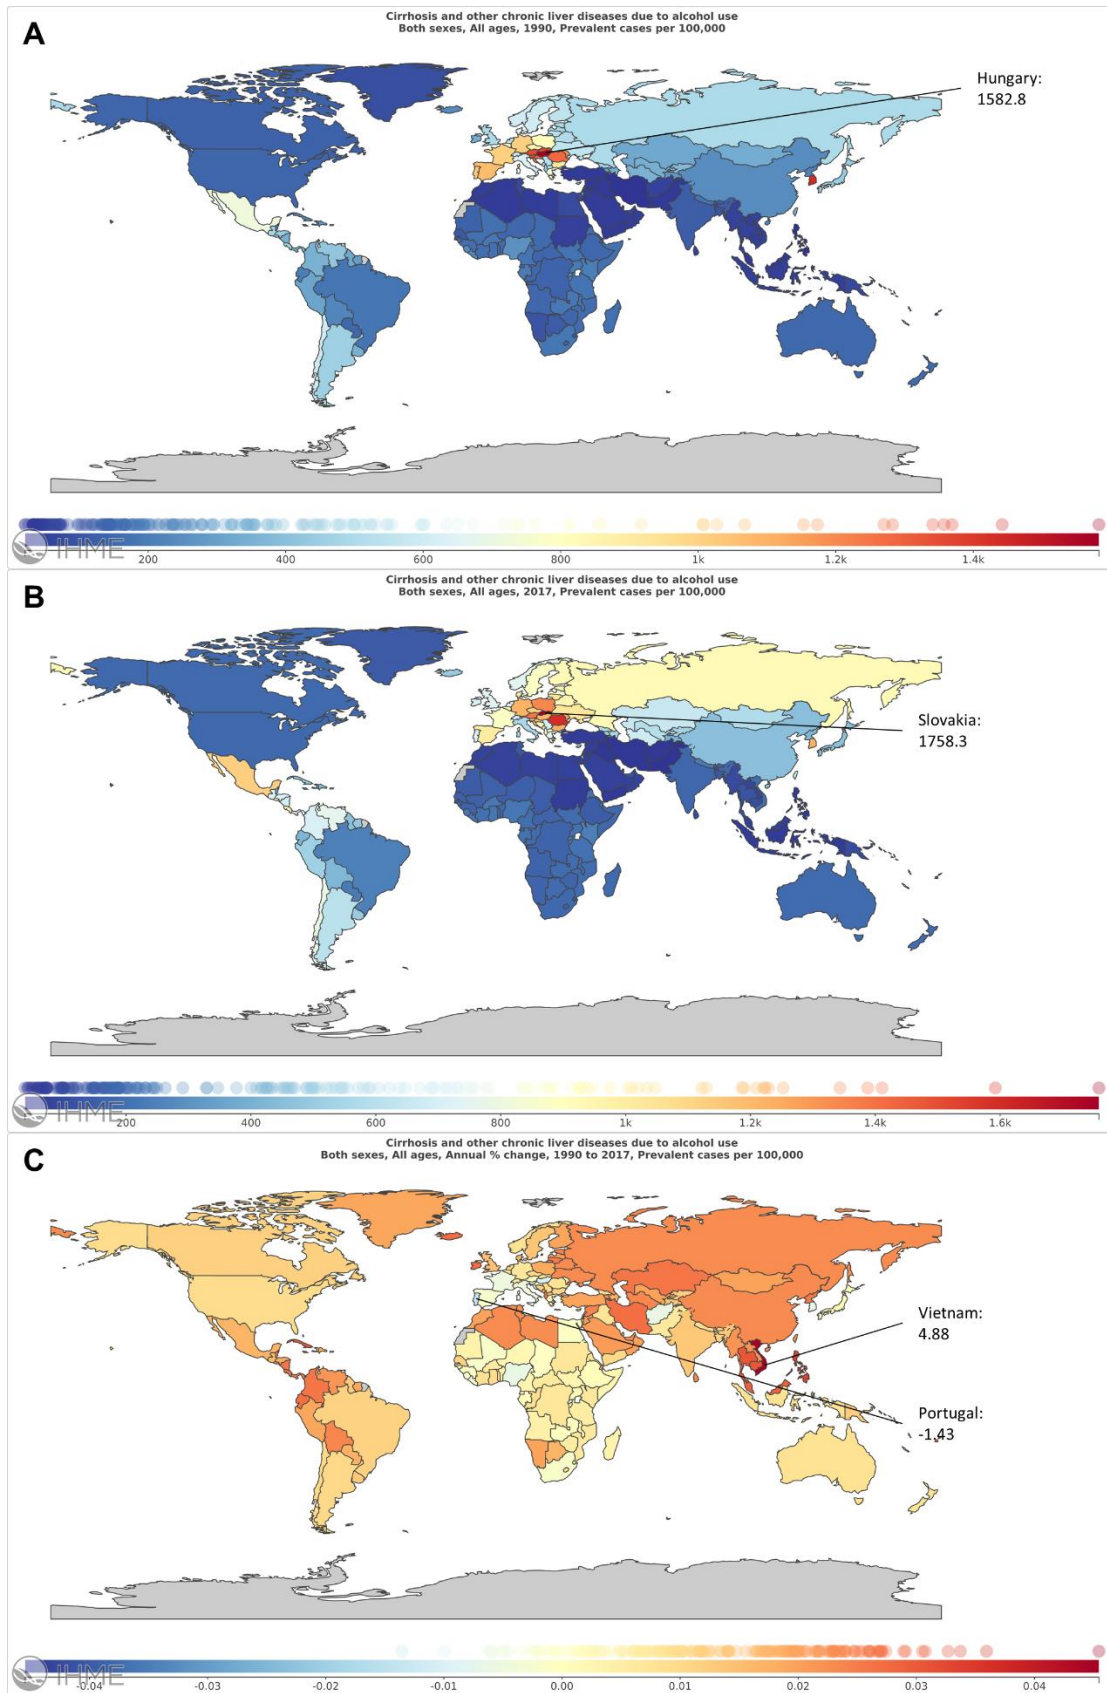

**Supplementary Figure 8. The global burden of liver cirrhosis caused by NASH in countries. (A)** The ASR of liver cirrhosis caused by NASH in 1990. **(B)** The ASR of liver cirrhosis caused by NASH in 2017. **(C)** The EAPC of liver cirrhosis caused by NASH from 1990 to 2017.



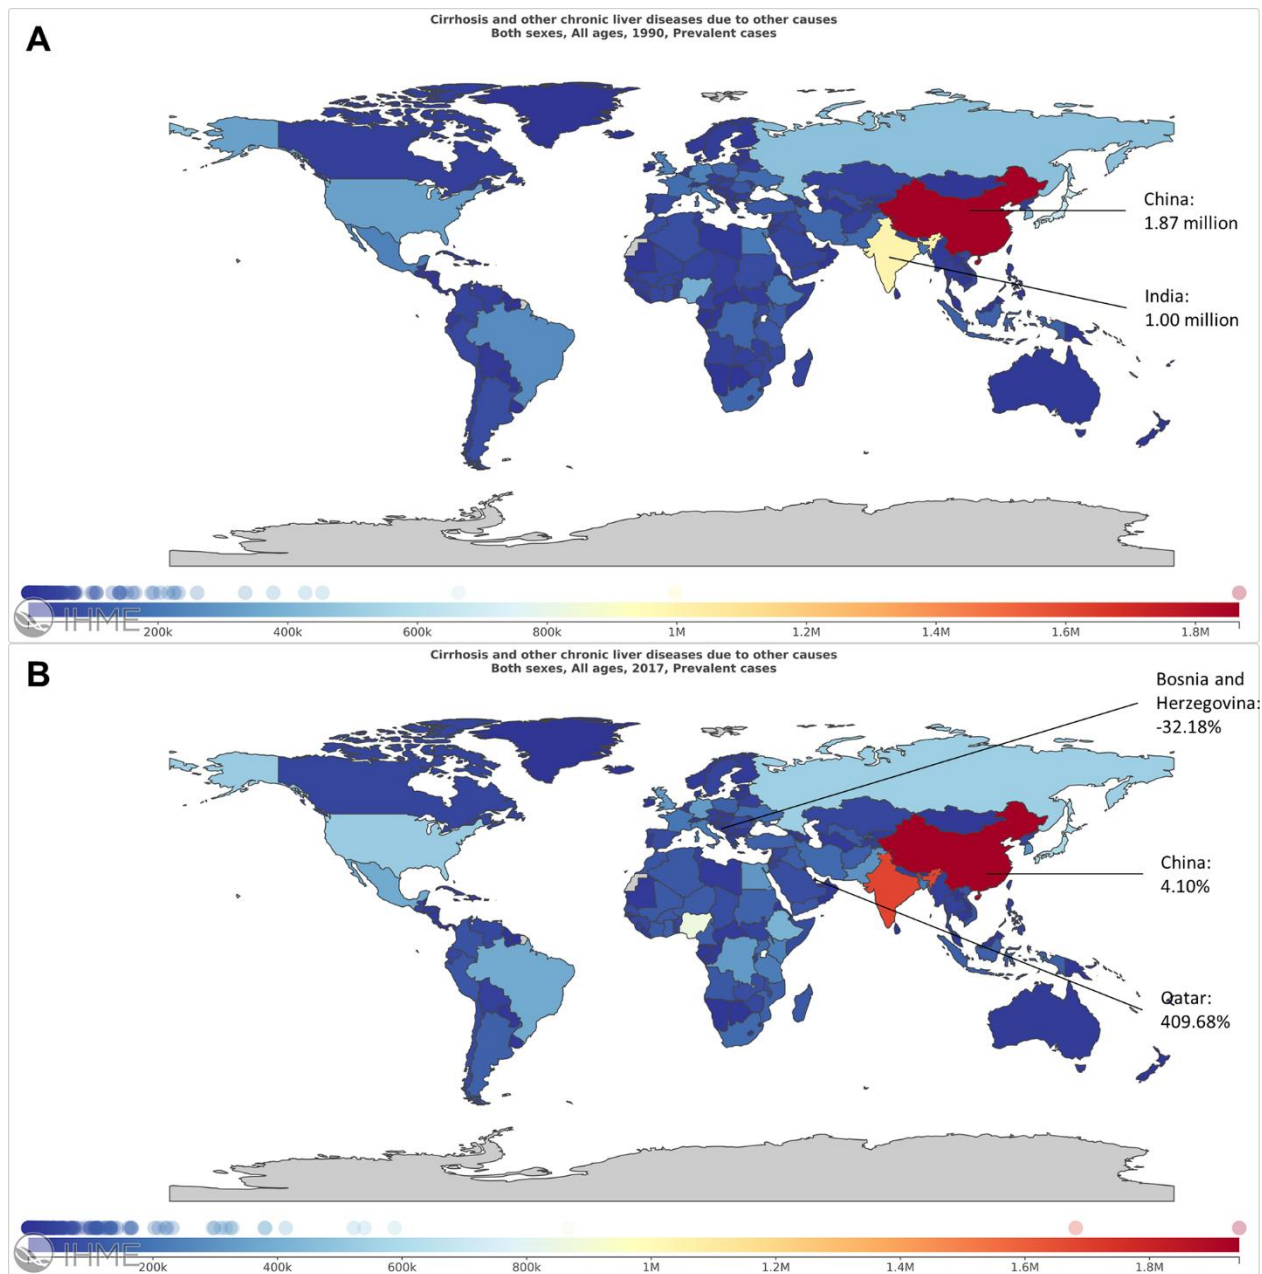

**Supplementary Figure 9. The worldwide prevalence cases of liver cirrhosis caused by other causes in countries. (A)** The worldwide prevalence cases of liver cirrhosis caused by other causes in 1990. **(B)** The worldwide prevalence cases of liver cirrhosis caused by other causes in 2017.

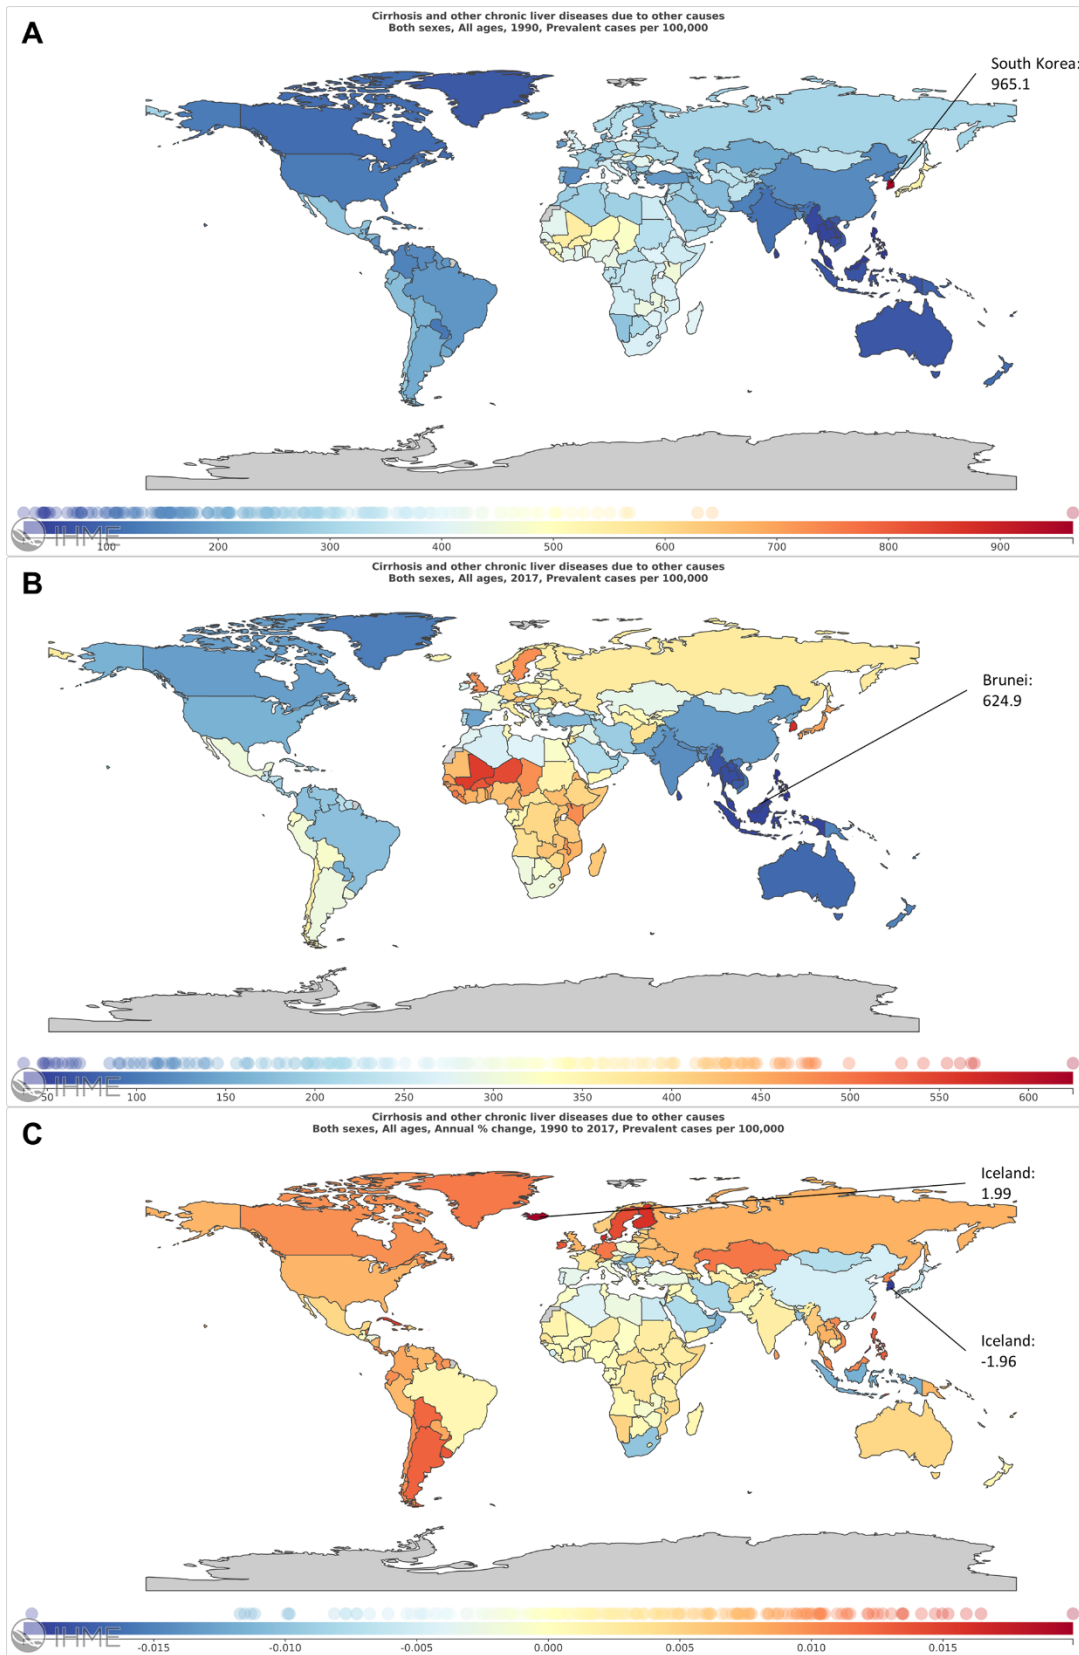

**Supplementary Figure 10. The global burden of liver cirrhosis caused by other causes in countries. (A)** The ASR of liver cirrhosis caused by other causes in 1990. **(B)** The ASR of liver cirrhosis caused by other causes in 2017. **(C)** The EAPC of liver cirrhosis caused by other causes from 1990 to 2017.
